# Supplementary material for: (Pro)renin receptor involves in myocardial fibrosis and oxidative stress in diabetic cardiomyopathy via the PRR–YAP pathway
Source: PubMed Central journal article supplement (PMC7865047; doi:10.1038/s41598-021-82776-2), 2021-02-05

**(Pro)renin receptor involves in myocardial fibrosis and oxidative stress in diabetic cardiomyopathy via the PRR-YAP pathway**

Shiran Yu<sup>1,4,7#</sup>, Xuefei Dong<sup>1,2,7#</sup>, Min Yang<sup>1,3#</sup>, Qingtao Yu<sup>1</sup>, Jie Xiong<sup>1</sup>, Jing Chen<sup>5,6</sup>,  
Bo Dong<sup>1,7,8\*</sup>, Qing Su<sup>9\*</sup>

**supplementary information file**

**Figure 1**

Original images (un-cropped images)

# PRR

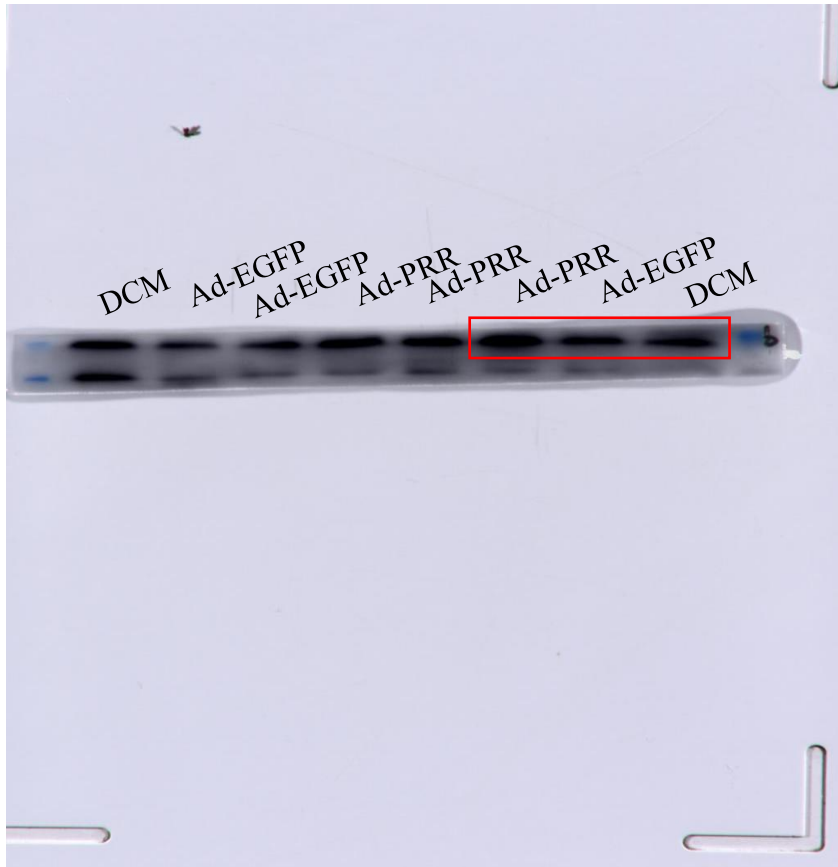

GAPDH

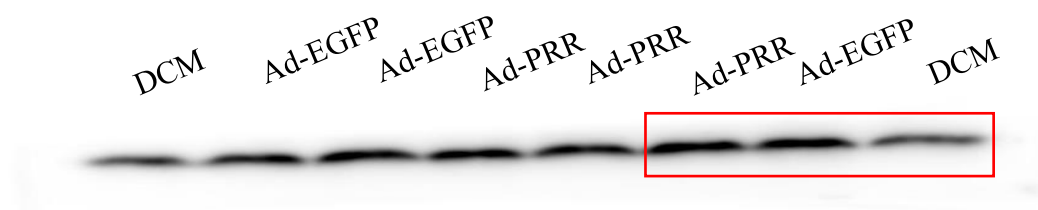

Figure 4

Original images (un-cropped images)

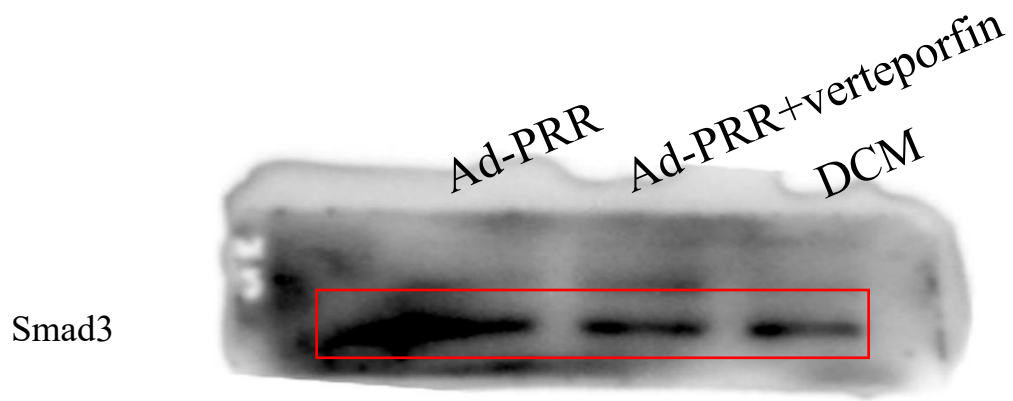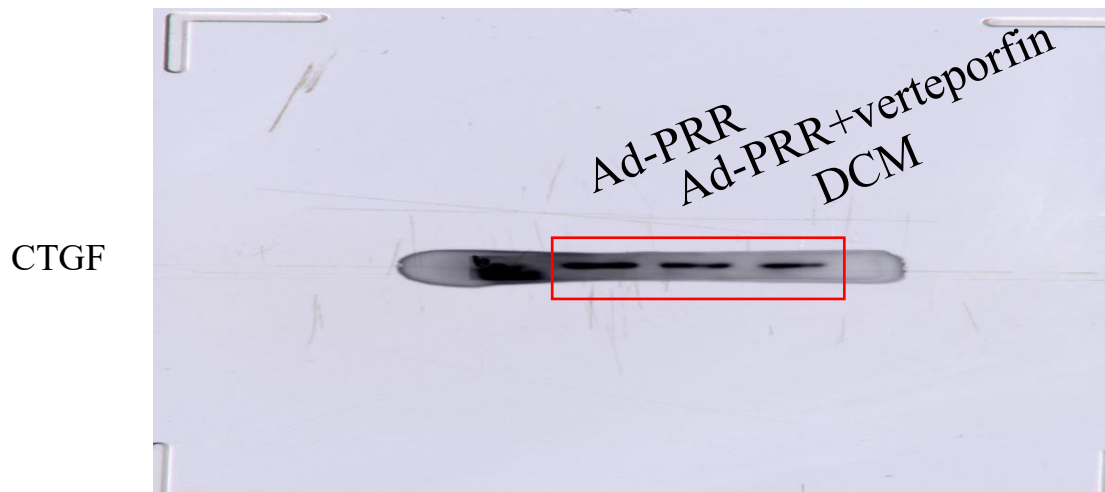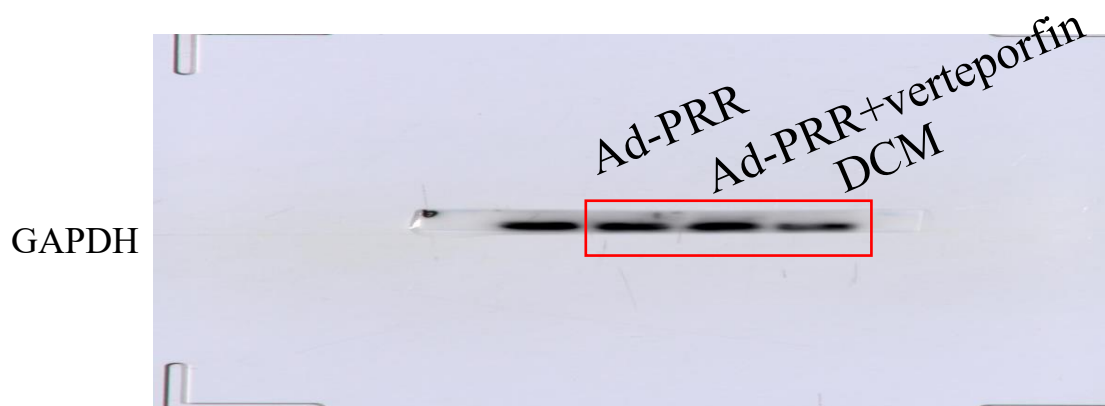



## Figure 5

Original images (un-cropped images)

PRR

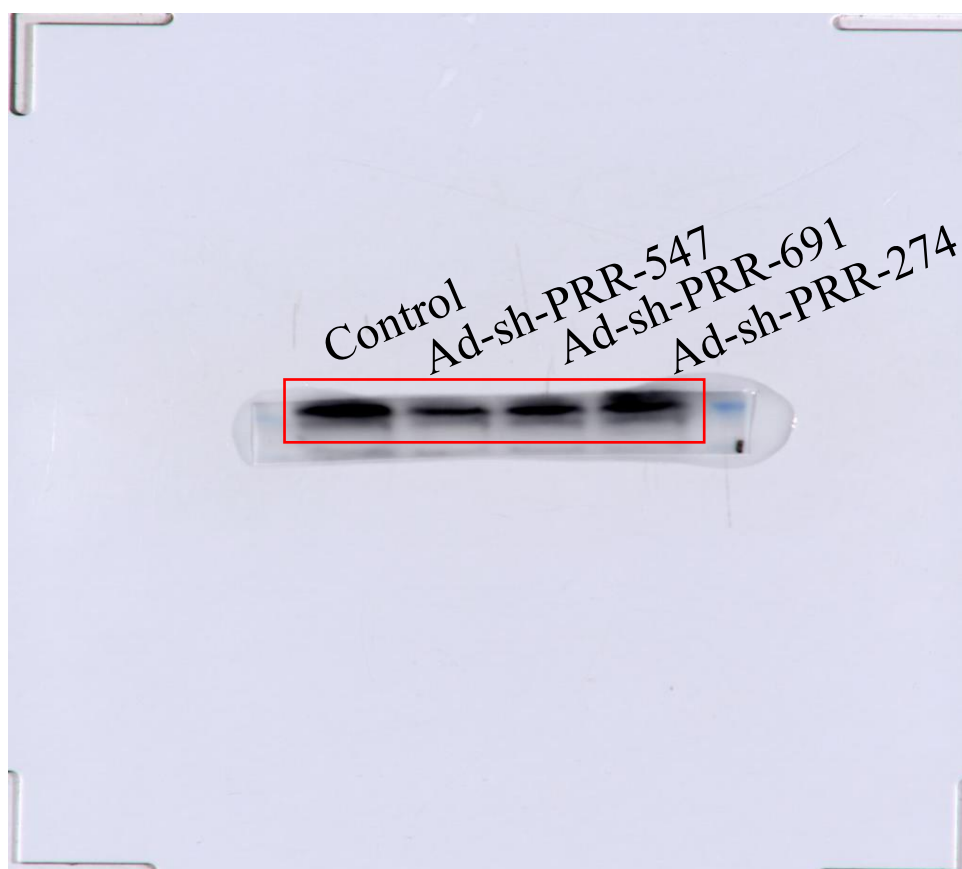

GAPDH

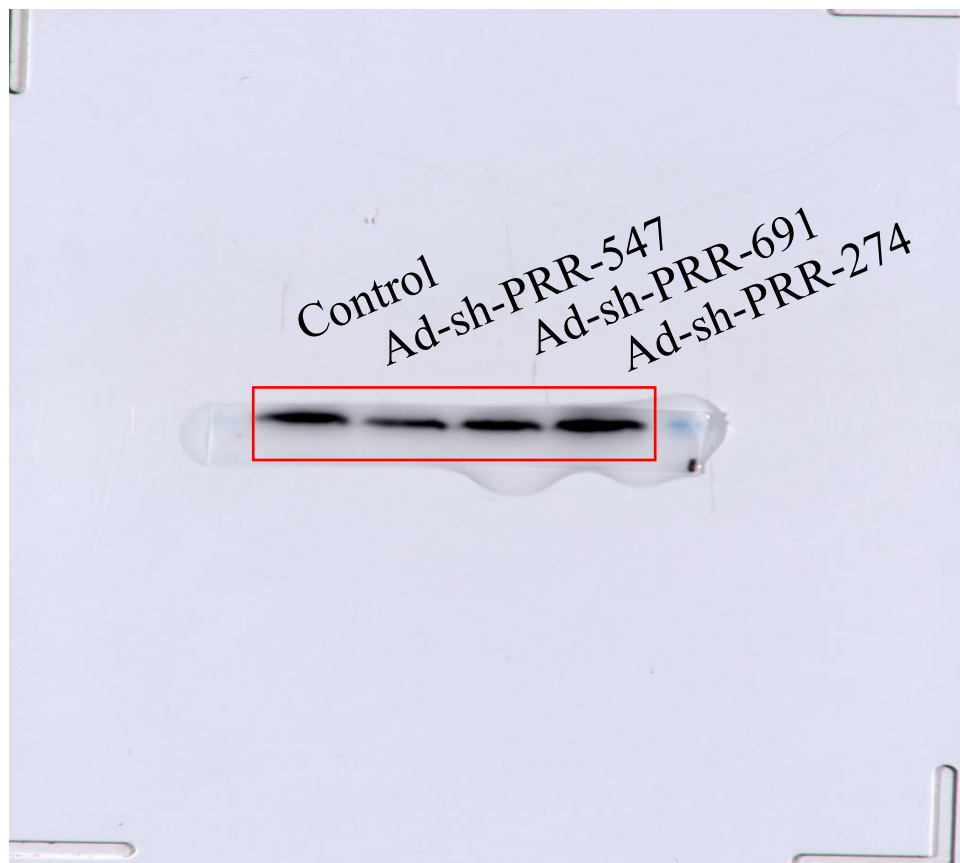

Figure 6

Original images (un-cropped images)

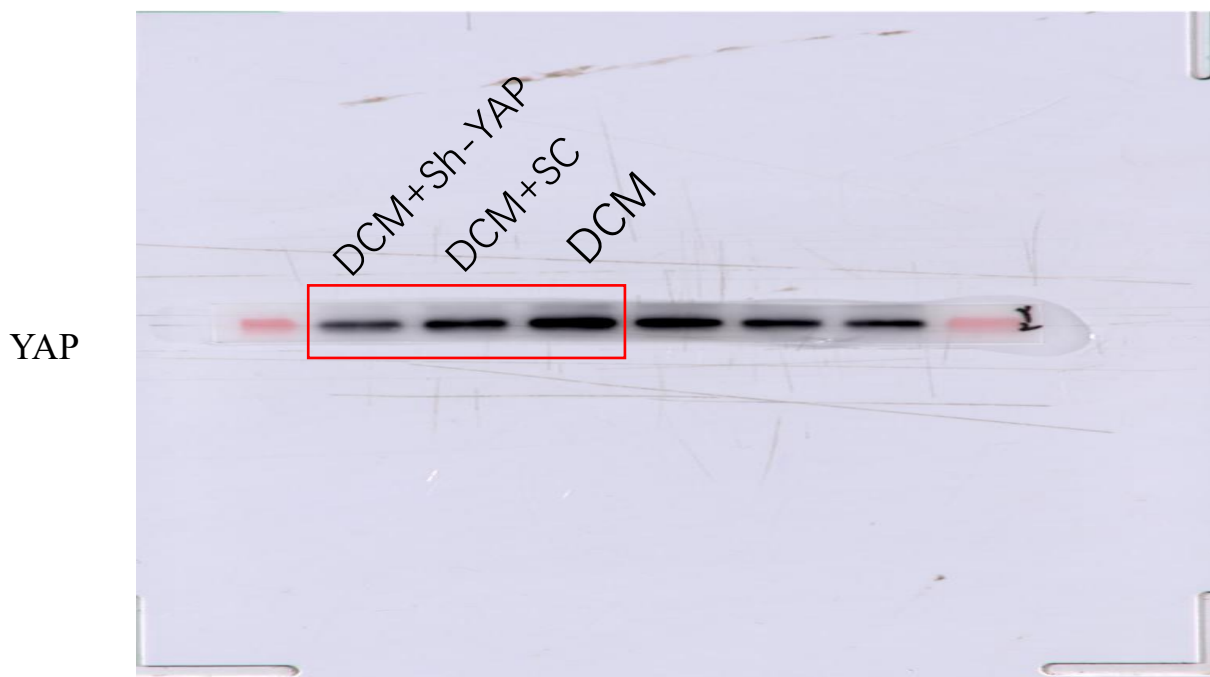



Smad3

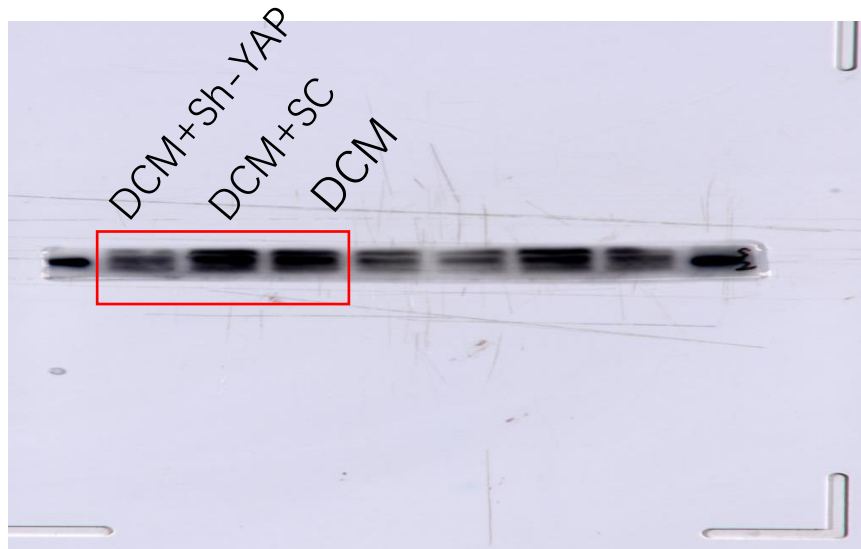

GAPDH

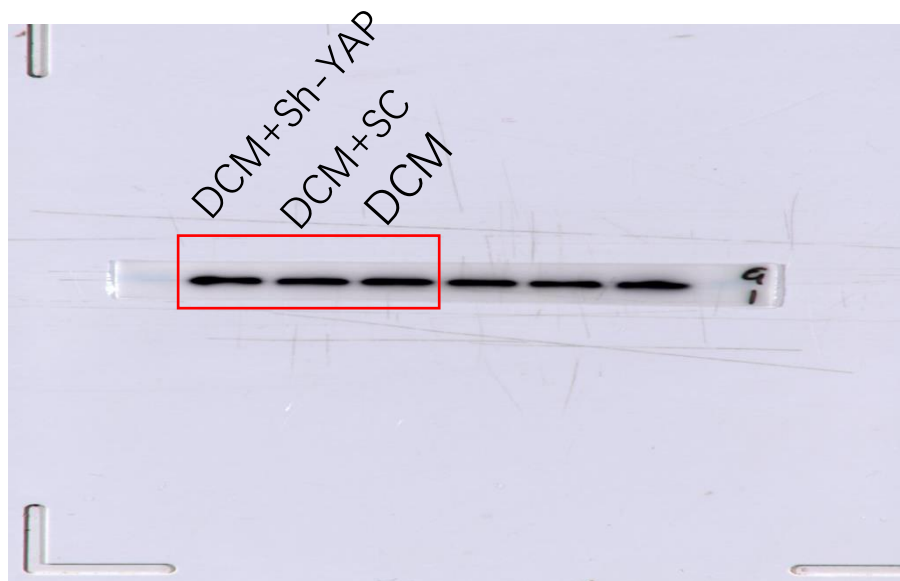

Supplement: 41598_2021_82776_MOESM1_ESM.pdf [file 41598_2021_82776_MOESM1_ESM.pdf]
